# Supplementary material for: Efficient Optimization of Stimuli for Model-Based Design of Experiments to Resolve Dynamical Uncertainty
Source: PLOS journal article supplement (doi:10.1371/journal.pcbi.1004488), 2015-09-17
Supplement: S1 (10.1371/journal.pcbi.1004488.s001) [file journal.pcbi.1004488.s001]

# Efficient Optimization of Stimuli for Model-based Design of Experiments to Resolve Dynamical Uncertainty

Thembi Mdluli<sup>1,\*</sup>, Gregory T. Buzzard<sup>2</sup>, Ann E. Rundell<sup>1,\*</sup>

**1 Weldon School of Biomedical Engineering, Purdue University, West Lafayette, IN, USA**

**2 Mathematics Department, Purdue University, West Lafayette, IN, USA**

**\* E-mail: Corresponding; Thembi Mdluli: [tmdluli@purdue.edu](mailto:tmdluli@purdue.edu), Ann E. Rundell: [rundell@purdue.edu](mailto:rundell@purdue.edu)**

## Supplementary Material

We demonstrate the importance of optimizing for the input by comparing the reduction in dynamical uncertainty for both the optimized input design and unoptimized input design and results are shown in Figure **S1**.

We further demonstrate that our algorithm is flexible and able to bound the dynamics of different plant systems. Using the Hes1 4-dimensional problem, four random parameter sets are selected within the range of parameter uncertainty to simulate the true system that generate data for the experiment design. These parameters are hidden to the user and the algorithm is allowed to select the optimal experiment design to discern each of the target dynamics. In Figure **S2**, we show the final dynamical uncertainty on the target states for each of the different randomly selected systems. This reduction in uncertainty bounds the true dynamics of each of the true system.

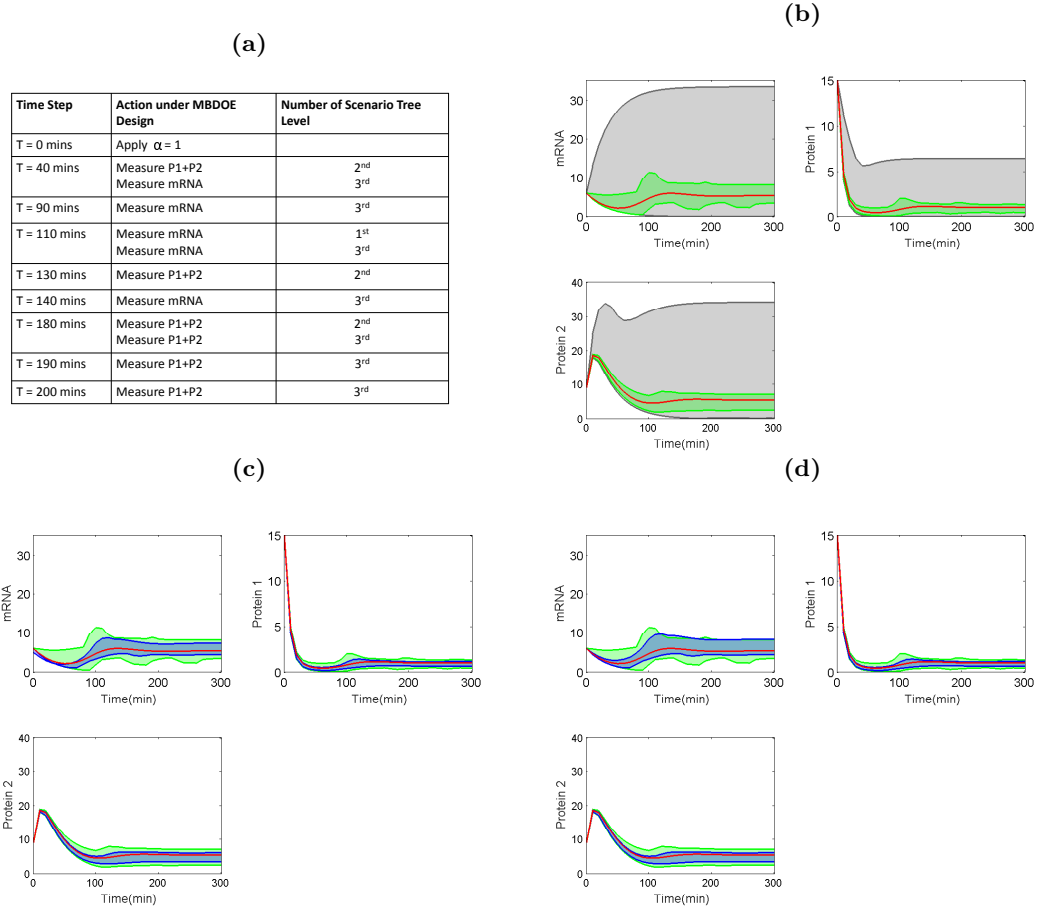

**Figure S1.** Comparison of Optimal Input MBDOE with Measurement Only MBDOE. (a) Optimal measurement pairs for the experimental design with only target input applied. (b) The resolution of the target states dynamics for the unperturbed system with target input  $\mathbf{u}_T$  and corresponding optimal measurements  $M_T$ . Grey shade shows the original uncertainty region in the states and the green shade shows the final uncertainty region with measurement only optimal design. The green shade shows a percentage decrease of the uncertain region from the grey region that correspond to 75%, 68% and 81% for mRNA,  $P_1$  and  $P_2$ , respectively. (c) Resolution of target states dynamics with target input  $\mathbf{u}_T$  (green shade) and under MBDOE optimal input  $\mathbf{u}^*$  (blue shade) given optimal measurements selected through the measurement only design  $M_T$ . The blue shaded uncertainty region shows a percentage decrease of the uncertain region corresponding to 86%, 82% and 83% while the green shade shows a decrease corresponding to 84%, 79% and 68% for mRNA, Protein1 and Protein 2, respectively. (d) Resolution of target states dynamics with target input  $\mathbf{u}_T$  (green shade) and with MBDOE optimal input  $\mathbf{u}^*$  (blue shade) given the optimal measurements associated with the optimal input design,  $M^*$ . The blue shade shows a percentage decrease of the uncertain region corresponding to 84%, 81%, and 86% while the green shade shows a decrease corresponding to 80%, 79%, and 82% for mRNA, Protein1 and Protein 2, respectively. In all the cases, the optimal input design gives the overall best resolution in the dynamics of the target system.

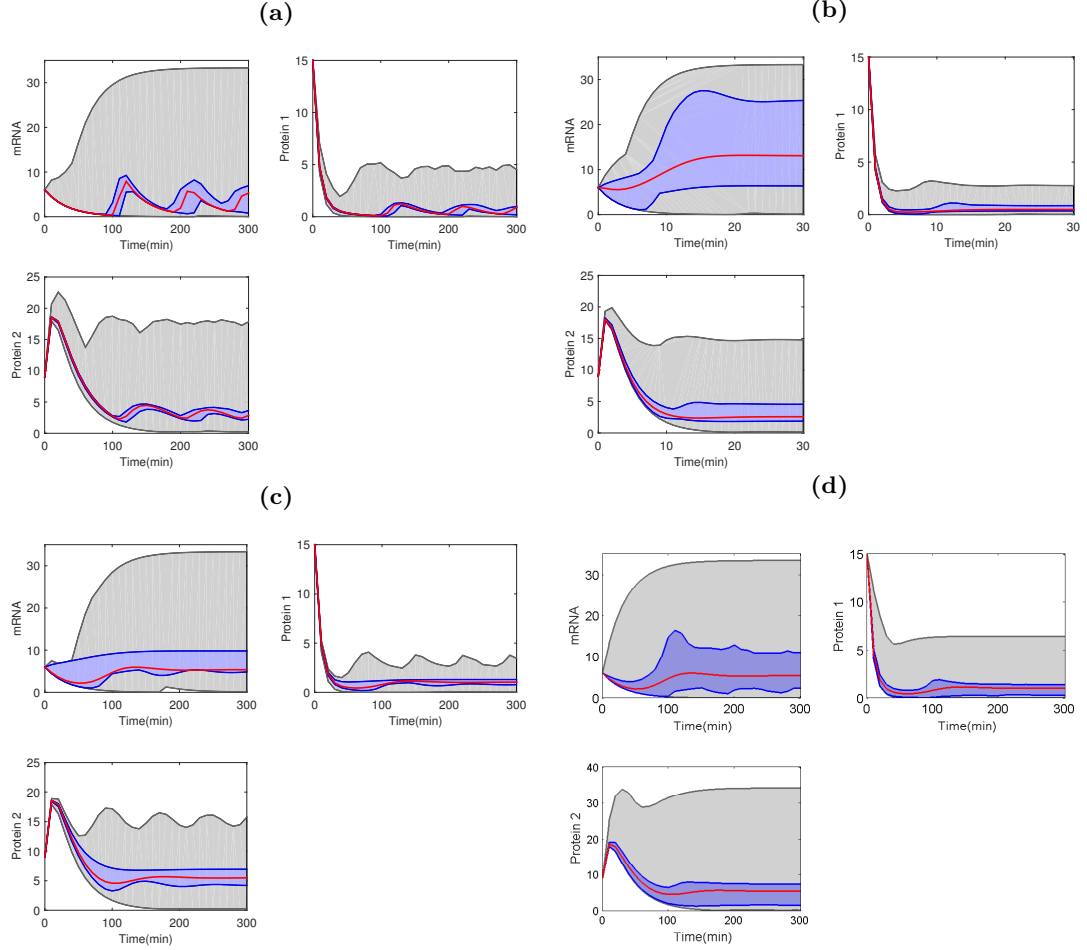

**Figure S2.** Reduction of uncertainty for systems generated with a hidden randomly selected true parameter set. The lowest worst case percentage reduction in the uncertainty regions for each of the cases: **(a)** is 78% observed in mRNA, **(b)** is 34% observed in mRNA, **(c)** is 74% observed in mRA and **(d)** is 52% observed in mRNA. The parameter sets used for each of the plants are for unknown parameter set,  $(P_0, h, \nu)^*$ : **(a)**  $(2.4, 20, 0.025)$ , **(b)**  $(1.3637, 0.6870, 0.0048)$ , **(c)**  $(2, 2, 0.25)$ , **(d)**  $(1.4, 1.12, 2 \times 10^{-2})$
